# Supplementary material
Source: Springer Nature journal article supplement (https://www.springermedizin.de/resource/supplementary/12916_2014_987_MOESM6_ESM.pdf/9598962)
Supplement: MOESM6 [file 9598962]

Supplemental Figure 5. Network of included RCTs for the base case PFS based on Kaplan Meier curves: Prior chemotherapy

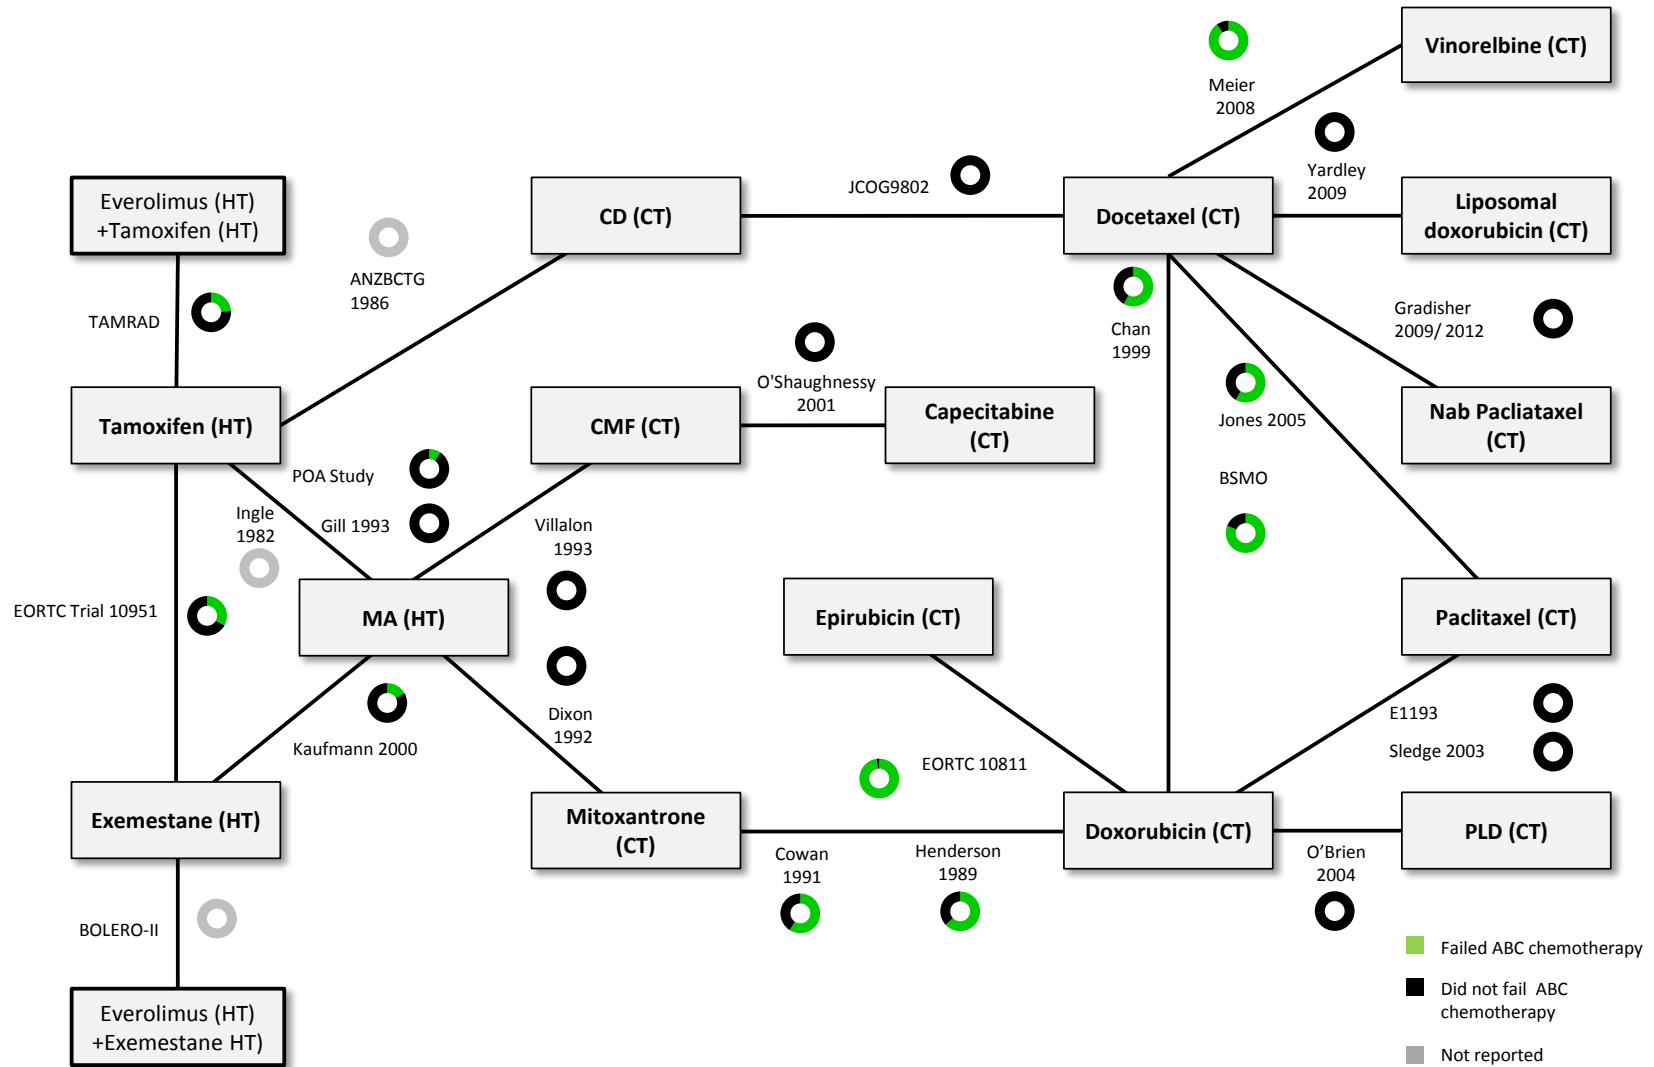

CD- Cyclophosphamide + doxorubicin; CMF- Cyclophosphamide + methotrexate + 5-fluorouracil; CT- Chemotherapy; ER- Estrogen receptor; HT- Hormonal therapy; PLD- Pegylated liposomal doxorubicin
